# Supplementary material
Source: Research Square preprint supplement (doi:10.21203/rs.3.rs-8862796/v1)
Supplement: Supplementary file 1 [file b93180bf283f324e156d695b.docx]

Supplementary File 01: Exploratory Factor Analysis

| Factor | Eigenvalue |  |
| --- | --- | --- |
| Factor 1 | 2.87544 |  |
| Factor 2 | 1.04158 |  |
| Factor 3 | 0.60883 |  |
| Factor 4 | 0.25328 |  |
| Factor 5 | 0.18135 |  |
| Factor 6 | 0.11718 |  |
| Factor 7 | 0.06019 |  |
| Factor 8 | 0.03508 |  |
| Factor 9 | -0.3127 |  |
| Factor 10 | -0.05164 |  |
| Factor 11 | -0.11400 |  |
| Factor 12 | -0.12431 |  |
| Factor 13 | -0.15587 |  |
| Factor 14 | -0.18139 |  |
| Factor 15 | -0.18623 |  |
| Factor 16 | -0.22857 |  |
| Factor 17 | -0.27428 |  |

**Supplementary File 02: Scree Plot**


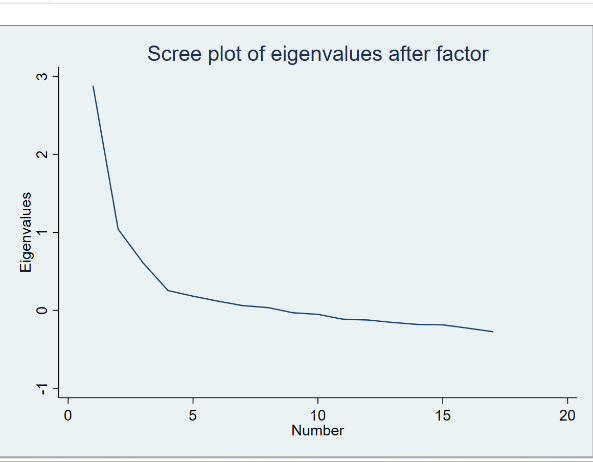


The above scree plot confirms that before the inversion, there are three points. As the this is one of the rules when assessing scree plots, that number of components before the point of inversion is the number of components that must be kept (Statistics Globe, 2023). However, in the context of our psychometric paper, the rule of interpretation of scree plot is the kaiser rule, which states that only components with an eigenvalue of greater than 1 must be retained. In the case of the above scree plot there are only two points at which the eigen value exceeds 1.

This therefore means that only 2 components would be retained, this also confirms what was in the paper that only two factors have been retained.
